# Supplementary material for: New Peptide Functionalized Nanostructured Lipid Carriers with CNS Drugs and Evaluation Anti-proliferative Activity
Source: Int J Mol Sci. 2022 Jun 26;23(13):7109. doi: 10.3390/ijms23137109 (PMC9266917; doi:10.3390/ijms23137109)
Supplement: Supplementary file 1 [file ijms-23-07109-s001.zip › ijms-1744386-supplementary.pdf]

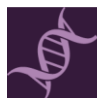

# Supplementary Materials: New peptide functionalized nanostructured lipid carriers with CNS drugs and evaluation anti-proliferative activity

Sara Silva <sup>1,2,3</sup>, Joana Marto <sup>3</sup>, Lúcia M. Gonçalves <sup>3</sup>, Diana Duarte <sup>1,2</sup>, Salomé Soares <sup>4,5</sup>, Francisco Vasques-Nóvoa <sup>6,7</sup>, António J. Almeida <sup>3</sup> and Nuno Vale <sup>1,8,9,\*</sup>

- <sup>1</sup> OncoPharma Research Group, Center for Health Technology and Services Research (CINTESIS), Rua Doutor Plácido da Costa, 4200-450 Porto, Portugal;
- <sup>2</sup> Faculty of Pharmacy, University of Porto, Rua de Jorge Viterbo Ferreira 228, 4050-313 Porto, Portugal;
- <sup>3</sup> Research Institute for Medicines (iMed.U LISBOA), Faculty of Pharmacy, University of Lisbon, Avenida Professor Gama Pinto, 1649-003, University of Lisbon, Portugal;
- <sup>4</sup> LSRE-LCM - Laboratory of Separation and Reaction Engineering – Laboratory of Catalysis and Materials, Faculty of Engineering, University of Porto, Rua Doutor Roberto Frias, 4200-465 Porto, Portugal;
- <sup>5</sup> ALiCE - Associate Laboratory in Chemical Engineering, Faculty of Engineering, University of Porto, Rua Doutor Roberto Frias, 4200-465 Porto, Portugal;
- <sup>6</sup> Cardiovascular R&D Center, Faculty of Medicine, University of Porto, Porto, Rua Doutor Plácido da Costa, s/n, 4200-450 Porto, Portugal Portugal;
- <sup>7</sup> Department of Surgery and Physiology, Faculty of Medicine, University of Porto, Alameda Professor Hernâni Monteiro, Porto, 4200-319, Portugal;
- <sup>8</sup> Department of Community Medicine, Information and Health Decision Sciences (MEDCIDS), Faculty of Medicine, University of Porto, Rua Doutor Plácido da Costa, s/n, 4200-450 Porto, Portugal
- <sup>9</sup> CINTESIS@RISE, Faculty of Medicine, University of Porto, Alameda Professor Hernâni Monteiro, 4200-319 Porto, Portugal
- \* Correspondence: [nunovale@med.up.pt](mailto:nunovale@med.up.pt); Tel.: +351-220426537

**TCP-MAP synthesis**  
**Synthesis of TCP-linker-N<sub>3</sub>**

*TCP or 2-PCPA (2-Tranylcypromine)*

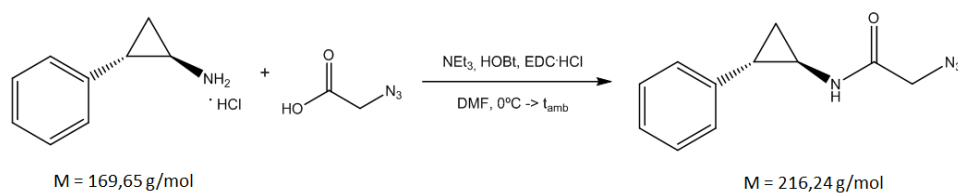

**Figure S1** - Schematic representation of conjugate TCP-linker-N<sub>3</sub>.

- Azidoacetic acid pre-activation (2 eq.);
- 2 h stirring with 2.5 eq. NEt<sub>3</sub>, 2 eq. HOBT and 3 eq. EDC·HCl (ice bath)
- m(2-PCPA)= 100 mg (limitant reagent)
- Solvent: DMF (10 mL) - too much volume
- Reaction time: 20h
- Treatment: liquid-liquid extractions with AcOEt + [NaCl (sat.) + NaHCO<sub>3</sub> (sat.) + CH<sub>3</sub>COOH 5% + H<sub>2</sub>O]
- Purification: Filtration with SiO<sub>2</sub> ('Dry Column Vacuum Chromatography'): eluent Hex/AcOEt 1:3 + AcOEt

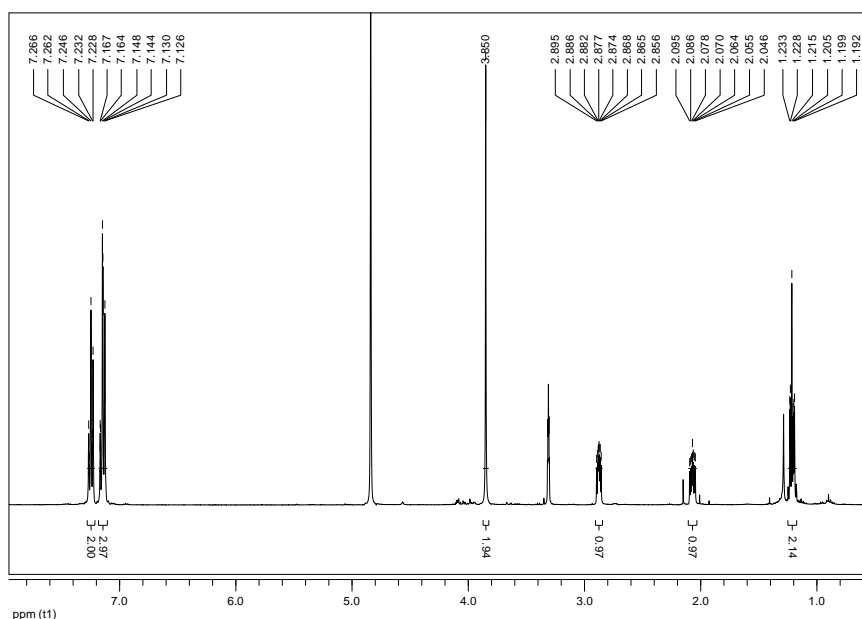

<sup>1</sup>H NMR (400 MHz, MeOD) δ(ppm) 7.27 – 7.23 (m, 2H), 7.17 – 7.13 (m, 2H), 3.85 (s, 2H), 2.87 (m, 1H), 2.09 – 2.05 (m, 1H), 1.23 – 1.19 (m, 2H).

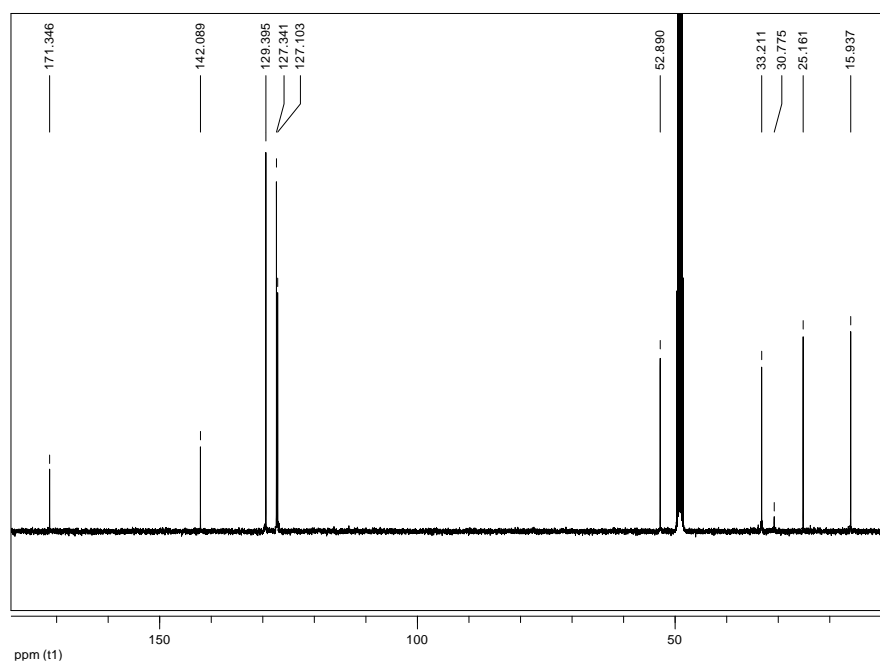

$^{13}\text{C}$  NMR (101 MHz, MeOD)  $\delta$ (ppm) 171.35 (C=O), 142.09 (C), 129.40 (2xCH), 127.34 (3xCH), 127.10 (CH<sub>2</sub>), 52.89 (CH<sub>2</sub>), 33.21 (CH), 25.16 (CH), 15.94 (CH<sub>2</sub>).

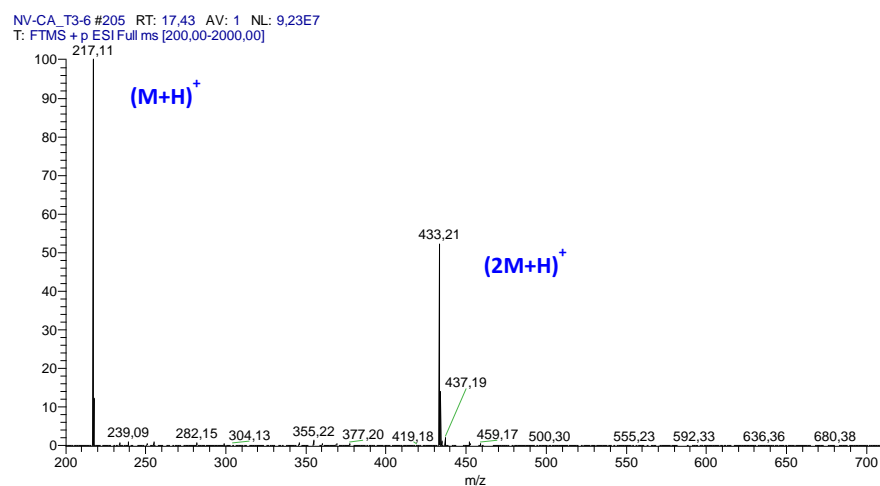

**Figure S2** - Mass spectrum (LC-ESI/Orbitrap MS, positive mode) of 2-TCP-linker-N<sub>3</sub>.

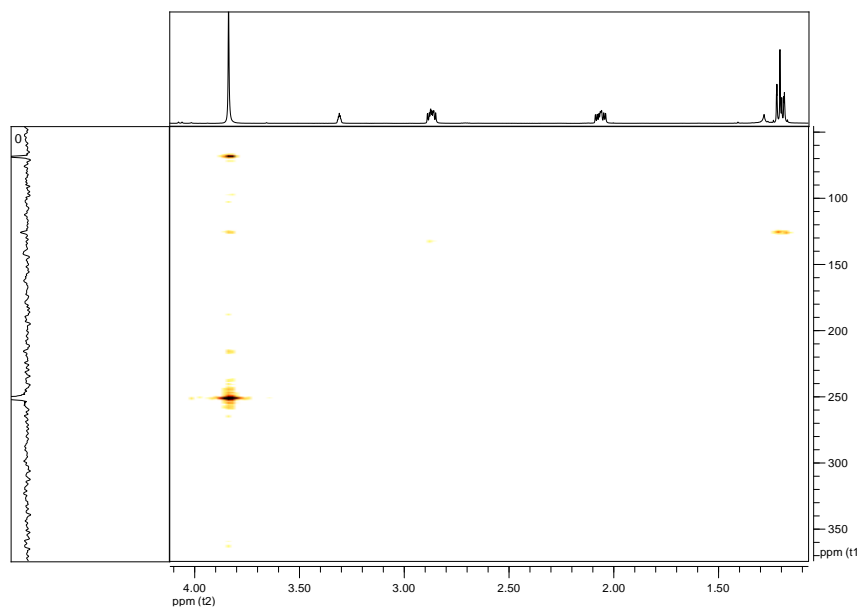

HMBC-  $^{15}\text{N}$  ( $\text{CD}_3\text{OD}$ )

- Aspect: yellow oil (when warm), solidifies when cold
- $\eta = 94.4 \%$

## Synthesis of MAP

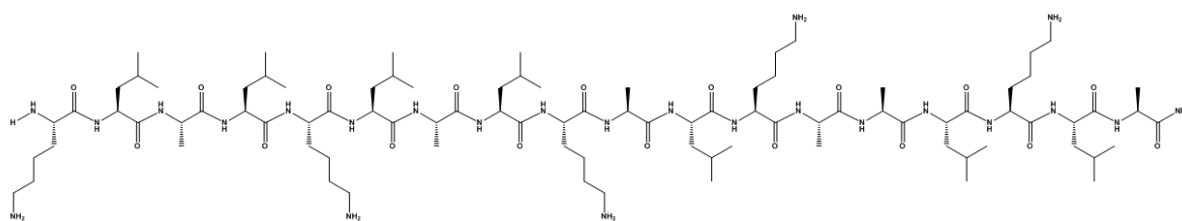

$M = 1876.50 \text{ g/mol}$

**Figure S3** –Structure of TCP-MAP conjugate.

Structure of peptide MAP.

- Solid support: resin Rink Amide (0.38 mmol/g)
- Synthesis scale: 0.2 mmol
- Protection scheme: orthogonal (Fmoc/tBu)
- Pre-activation: 10 eq. DIEA, 5 eq. amino acid in 5 mL DMF
- Coupling agent: 5 eq. HBTU
- Deprotection: 5 mL 20% piperidine in DMF
- Cleavage: free-thiols cocktail (95 % TFA + 2.5 % H<sub>2</sub>O + 2.5 % TIS)

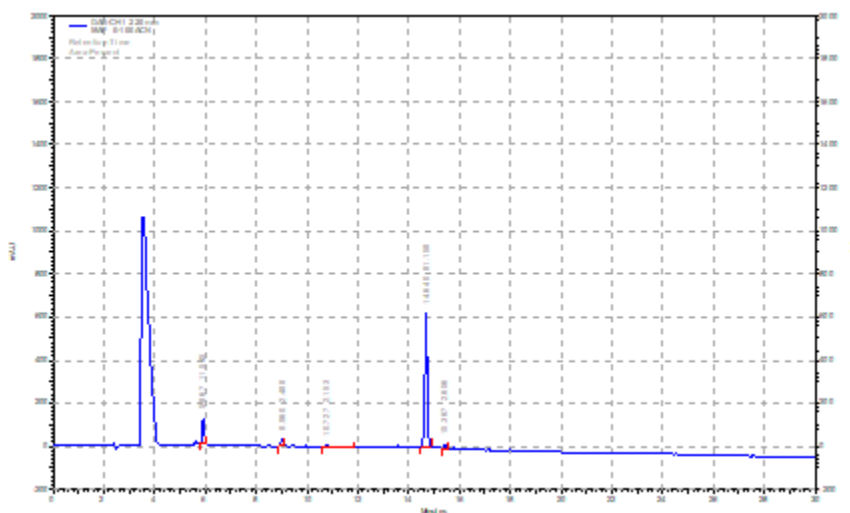

**Figure S4** - Chromatogram of the product of the manual synthesis of the MAP, acquired with a HPLC system, with a C18 column, using ACN in water with 0.05% TFA as eluent, in gradient mode (0 – 100%), for 30 minutes, at a flow of 1 mL/min and detection at  $\lambda = 220 \text{ nm}$ .

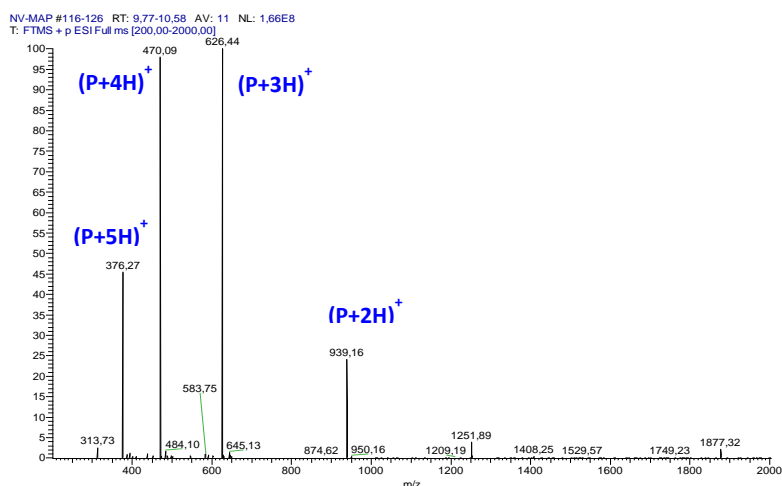

**Figure S5** - Mass spectrum (LC-ESI/Orbitrap MS, positive mode) of the peptide MAP.

- Purification: 20-50 % ACN
- Purity: 100 %

#### Synthesis of Pra-MAP:

- Orthogonal (Fmoc/tBu)
- Pre-activation: 10 eq. DIEA, 5 eq. amino acid in 5 mL DMF
- Coupling agent: 5 eq. HBTU
- Deprotection: 5 mL 20% piperidine in DMF
- Cleavage: free-thiols cocktail (95 % TFA + 2.5 % H<sub>2</sub>O + 2.5 % TIS)
- Purity: 100 %

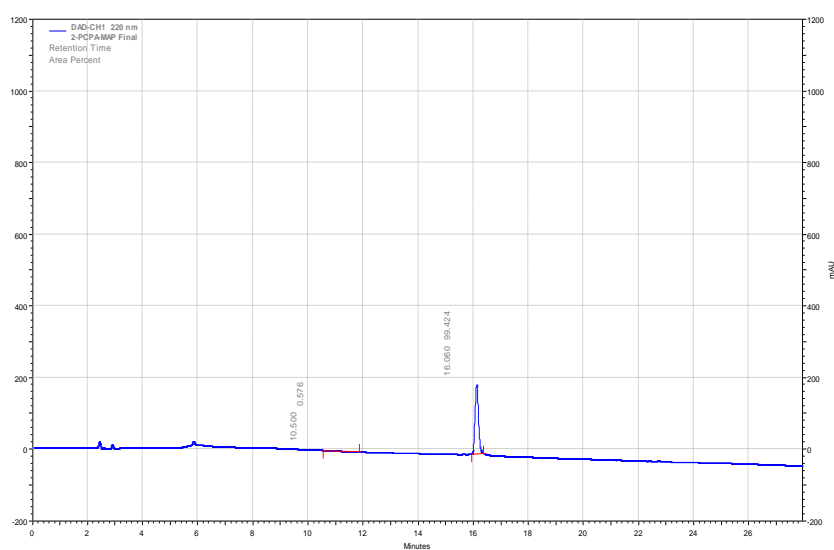

**Figure S6** - Chromatogram of the product of the manual synthesis of Pra-MAP, acquired with a HPLC system, with a C18 column, using ACN in water with 0.05% TFA as eluent, in gradient mode (0 – 100%), for 30 minutes, at a flow of 1 mL/min and detection at  $\lambda = 220$  nm.

## Synthesis of TCP-MAP

### Click reaction (CuAAC)

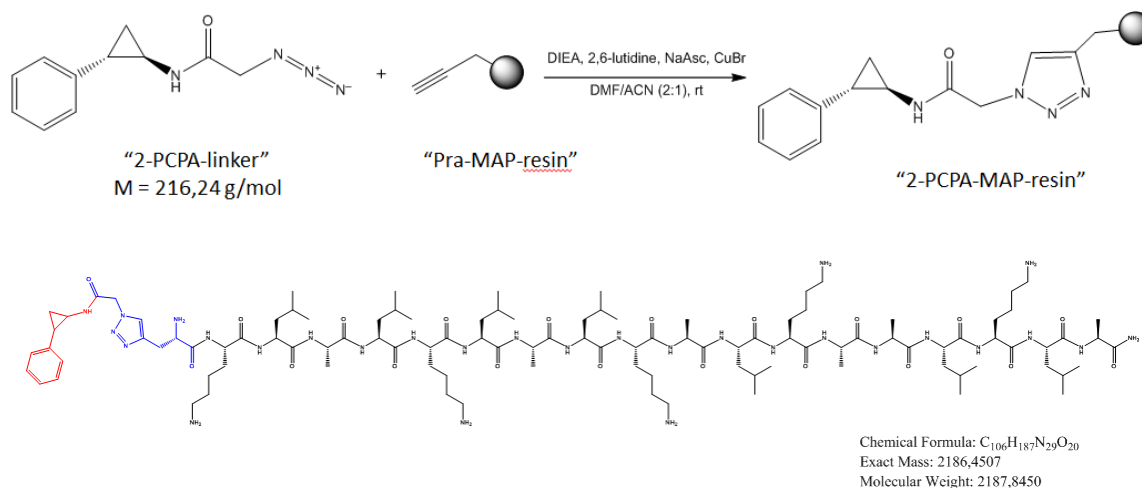

**Figure S7** - Schematic representation of conjugate TCP-MAP formation through click reaction; Structure of TCP-MAP conjugate.

- Solid support: resin Rink Amide (0.38 mmol/g)
- Synthesis scale: 0.2 mmol
- 1 eq. "2-PCPA-linker", 10 eq. DIEA, 10 eq. 2,6-lutidine, 1 eq. NaAsc, 1 eq. CuBr
- Solvent: DMF + ACN (2:1, 3 mL)
- Reaction time: 24h
- Treatment: resin wash (filtration) with  $H_2O$ , MeOH, DMF and DCM (3x each)
- Cleavage: thiol-free cocktail (95 % TFA + 2.5 %  $H_2O$  + 2.5 % TIS)

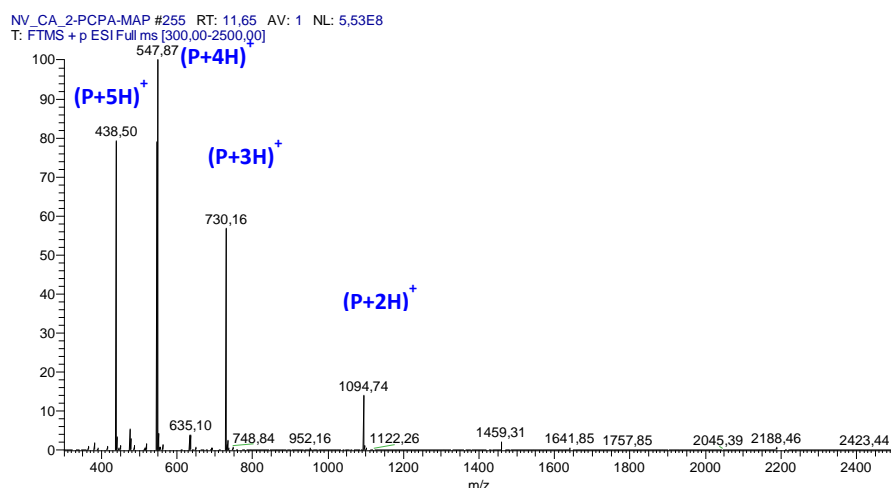

**Figure S8** - Mass spectrum (LC-ESI/Orbitrap MS, positive mode) of the peptide TCP-MAP.

- Purification: 20-50 % ACN
- Purity: 100 %

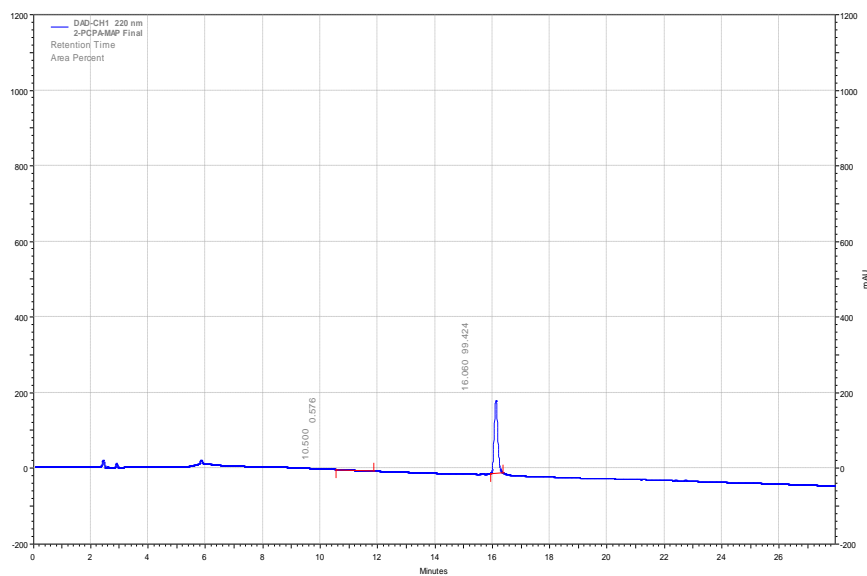

**Figure S9** - Chromatogram of the product of the manual synthesis of TCP-MAP, acquired with a HPLC system, with a C18 column, using ACN in water with 0.05% TFA as eluent, in gradient mode (0 – 100%), for 30 minutes, at a flow of 1 mL/min and detection at  $\lambda = 220$  nm.

## In vitro cytotoxicity assays against Caco-2 cell line

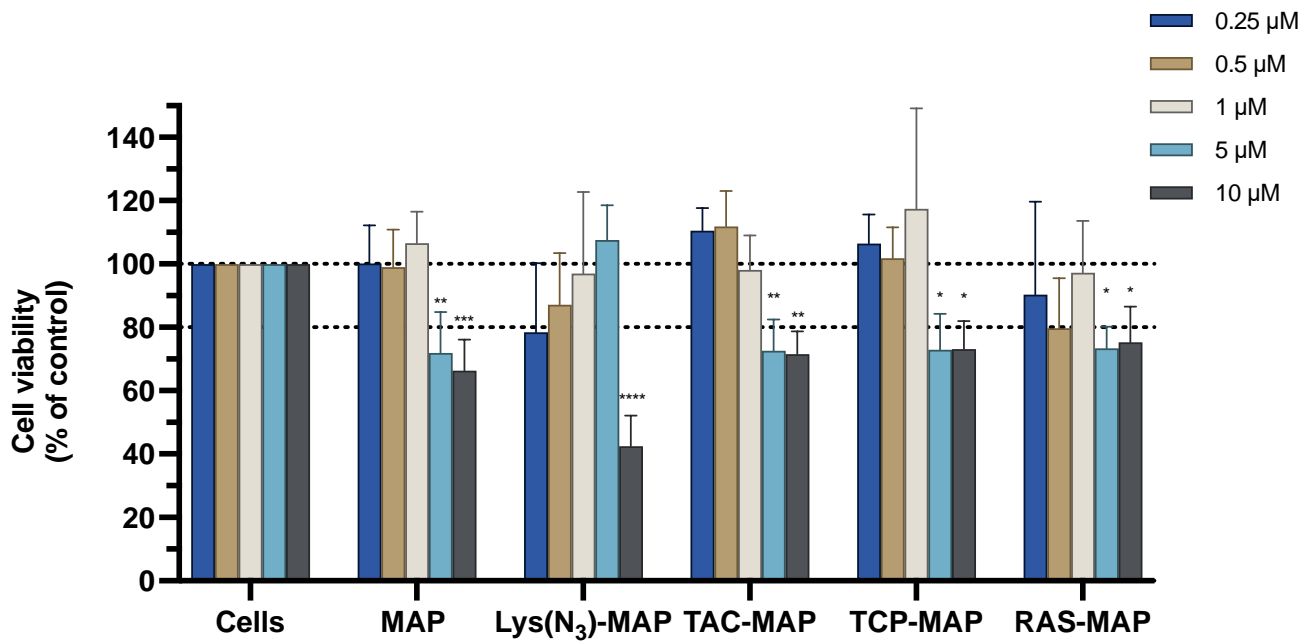

**Figure S10** – Relative cell viability of Caco-2 cell line measured by the SRB assay after 24 h incubation. Treatment with free MAP, Lys(N<sub>3</sub>)-MAP, TAC-MAP, TCP-MAP and RAS-MAP (0.25 μM-10 μM). Results are expressed as mean ± SD (n = 3 or 6). Statistical analysis between the control groups was performed using two-way ANOVA with Tukey's multiple comparisons test (\*  $p < 0.05$ ; \*\*  $p < 0.01$ ; \*\*\*  $p < 0.001$ ; \*\*\*\*  $p < 0.0001$ ).

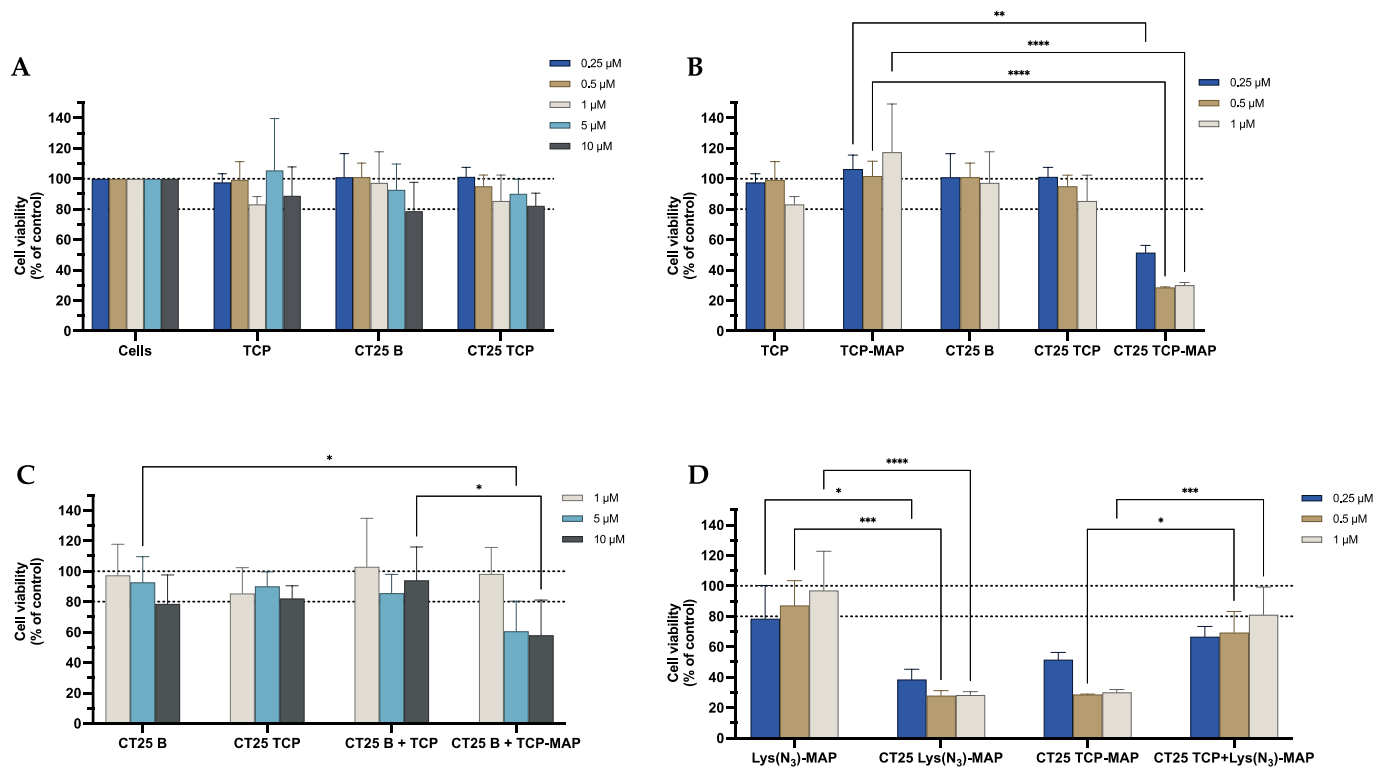

**Figure S11** - Relative cell viability of Caco-2 cell line measured by the SRB assay after 24 h incubation. (A) represents NLC safety test with the treatment of free TCP, blank CT25 and TCP loaded CT25 (0.25-10  $\mu$ M). (B) Represents differences in the cell viability of treatment with free TCP, TCP-MAP, blank CT25, TCP loaded CT25, MAP, TCP-MAP loaded CT25 (0.25-10  $\mu$ M). (C) Represents co-administration of TCP and TCP-MAP with blank CT25 (1-10  $\mu$ M). (D) Represents the data obtained from the encapsulation of Lys(N<sub>3</sub>)-MAP and co-encapsulation of TCP and Lys(N<sub>3</sub>)-MAP in the NLC compared to peptide conjugate. Results are expressed as mean $\pm$ SD (n = 4). Statistical analysis between the groups was performed using two-way ANOVA with Tukey's multiple comparisons test (\*  $p$  < 0.05; \*\*  $p$  < 0.01; \*\*\*  $p$  < 0.001; \*\*\*\*  $p$  < 0.0001).

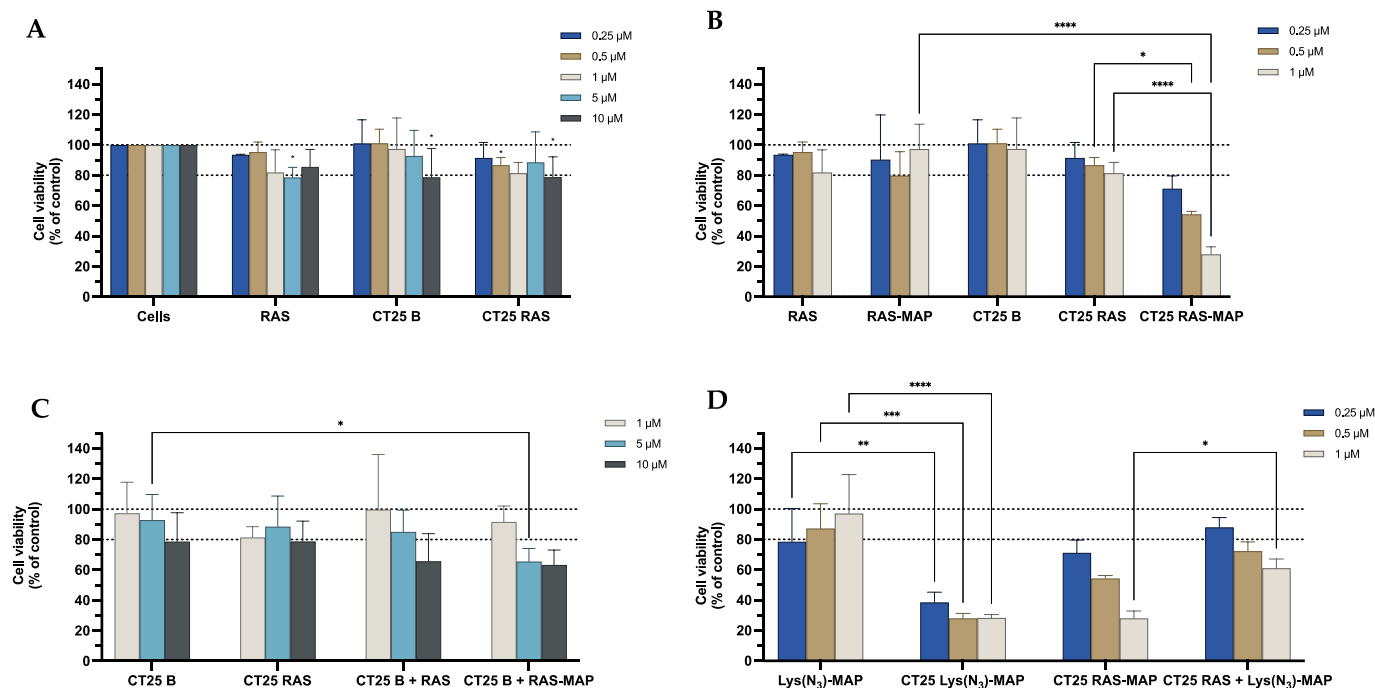

**Figure S12** - Relative cell viability of Caco-2 cell line measured by the SRB assay after 24 h incubation. (A) represents NLC safety test with the treatment of free RAS, blank CT25 and RAS loaded CT25 (0.25-10  $\mu$ M). (B) Represents differences in the cell viability of treatment with free RAS, RAS-MAP, blank CT25, RAS loaded CT25, MAP, RAS-MAP loaded CT25 (0.25-10  $\mu$ M). (C) Represents co-administration of RAS and RAS-MAP with blank CT25 (1-10  $\mu$ M). (D) Represents the data obtained from the encapsulation of Lys(N<sub>3</sub>)-MAP and co-encapsulation of RAS and Lys(N<sub>3</sub>)-MAP in the NLC compared to peptide conjugate. Results are expressed as mean $\pm$ SD (n = 4). Statistical analysis between the groups was performed using two-way ANOVA with Tukey's multiple comparisons test (\*  $p$  < 0.05; \*\*  $p$  < 0.01; \*\*\*  $p$  < 0.001; \*\*\*\*  $p$  < 0.0001).

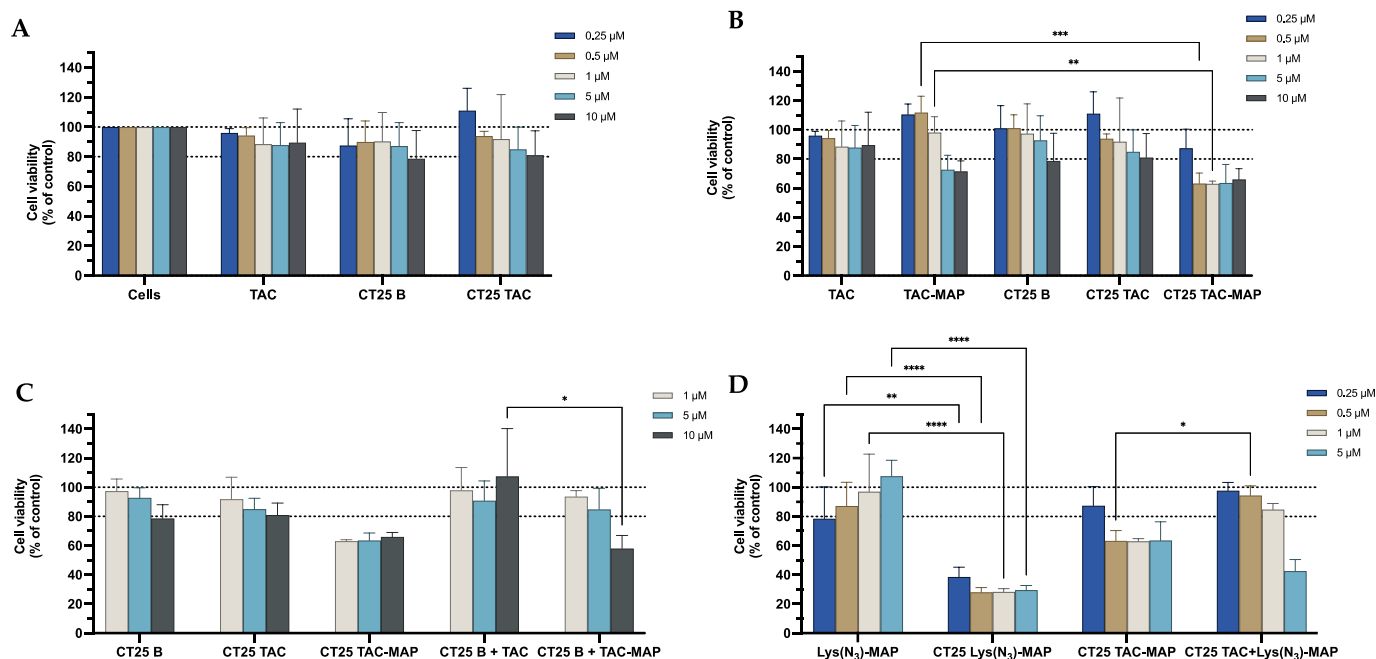

**Figure S13** - Relative cell viability of Caco-2 cell line measured by the SRB assay after 24 h incubation. (A) represents NLC safety test with the treatment of free TAC, blank CT25 and TAC loaded CT25 (0.25-10  $\mu$ M). (B) Represents differences in the cell viability of treatment with free TAC, TAC-MAP, blank CT25, TAC loaded CT25, MAP, TAC-MAP loaded CT25 (0.25-10  $\mu$ M). (C) Represents co-administration of TAC and TAC-MAP with blank CT25 (1-10  $\mu$ M). (D) Represents the data obtained from the encapsulation of Lys(N<sub>3</sub>)-MAP and co-encapsulation of TAC and Lys(N<sub>3</sub>)-MAP in the NLC compared to peptide conjugate. Results are expressed as mean $\pm$ SD (n = 4). Statistical analysis between the groups was performed using two-way ANOVA with Tukey's multiple comparisons test (\*  $p$  < 0.05; \*\*  $p$  < 0.01; \*\*\*  $p$  < 0.001; \*\*\*\*  $p$  < 0.0001).

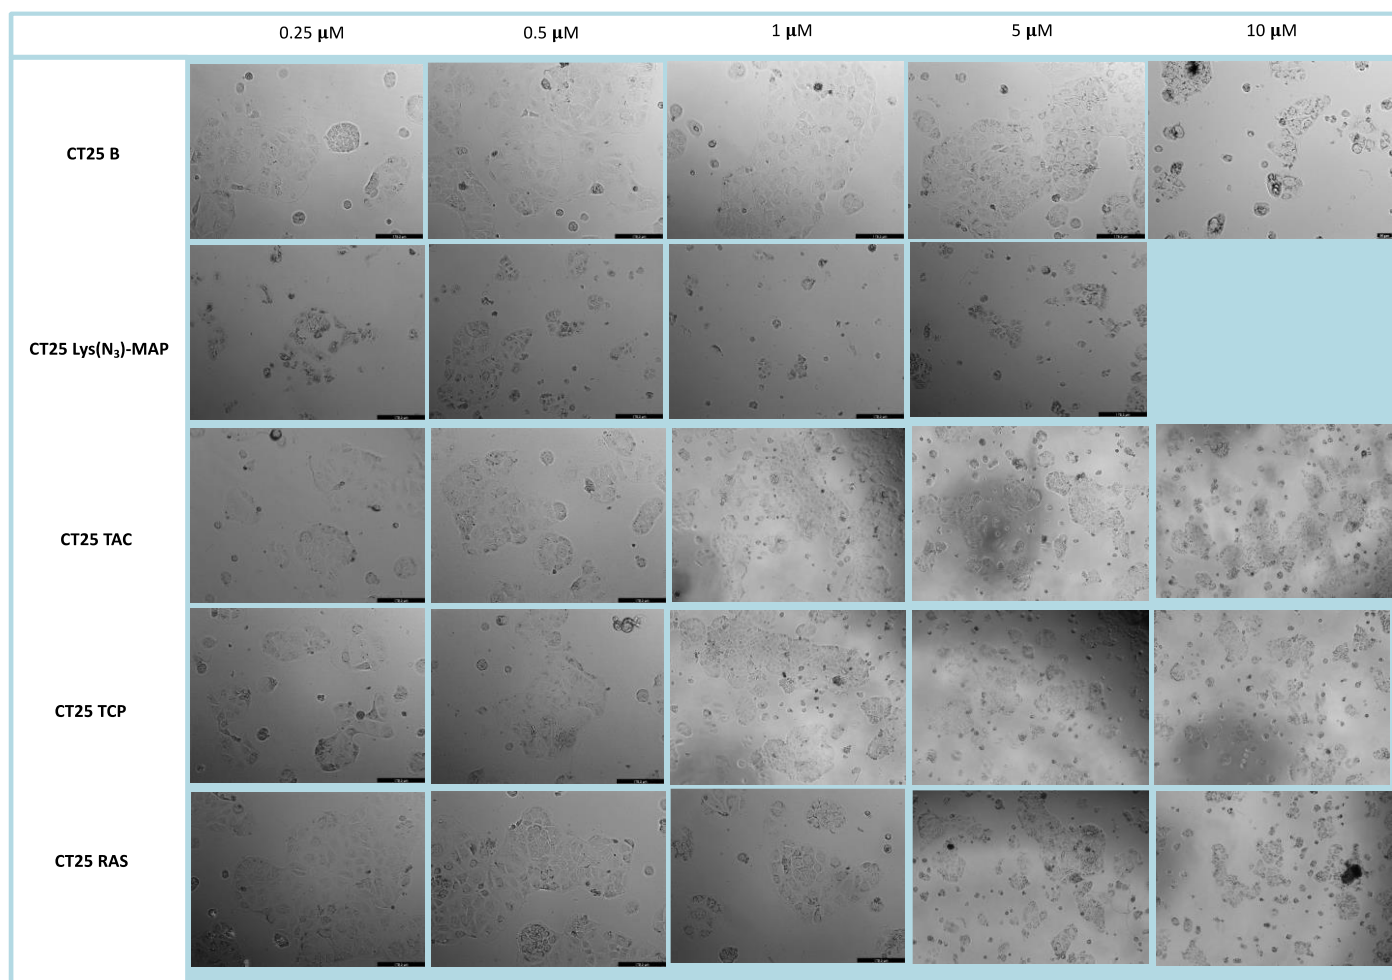

**Figure S14** - Microscope cellular visualization through Lionheart FX and Leica DFC350 FX of treatment with free drug and NLC loaded formulations on Caco-2 cell line at a concentration of 0.25, 0.5, 1, 5 and 10  $\mu\text{M}$ .

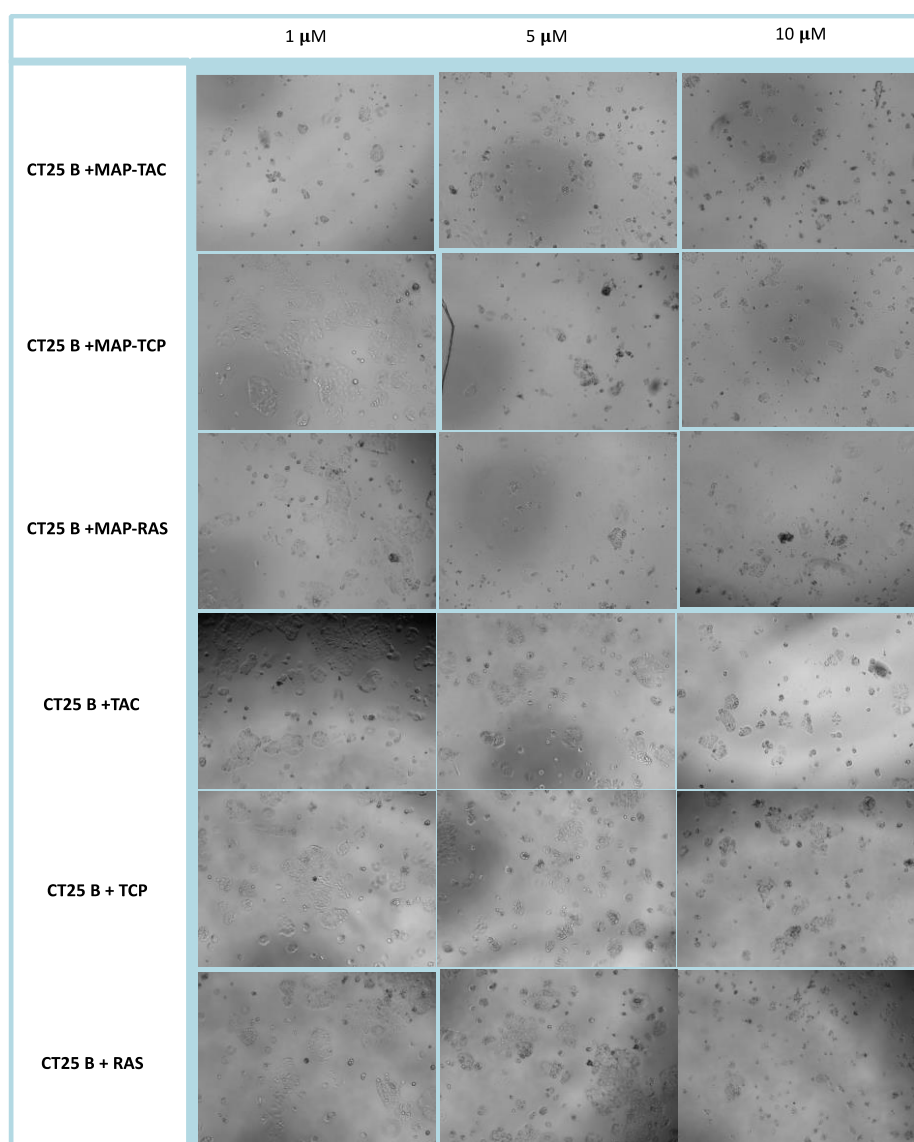

**Figure S15** - Microscope cellular visualization through Lionheart FX and Leica DFC350 FX of treatment with free drug and NLC loaded formulations on Caco-2 cell line at a concentration of 1, 5 and 10  $\mu$ M.

# In vitro cytotoxicity assays against SH-SY5Y

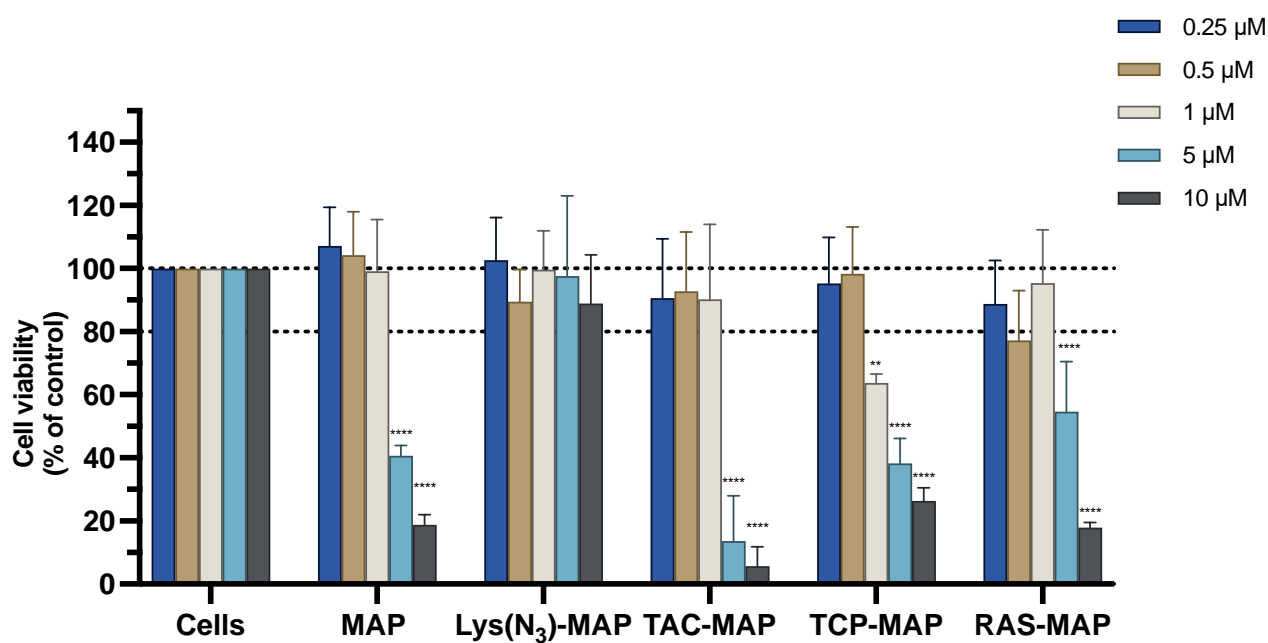

**Figure S16** – Relative cell viability of SH-SY5Y cell line measured by the SRB assay after 24 h incubation. Treatment with free MAP, Lys(N<sub>3</sub>)-MAP, TAC-MAP, TCP-MAP and RAS-MAP (0.25 μM-10 μM). Results are expressed as mean±SD (n = 3 or 6). Statistical analysis between the control groups was performed using two-way ANOVA with Tukey's multiple comparisons test (\*\*  $p < 0.01$ ; \*\*\*\*  $p < 0.0001$ ).

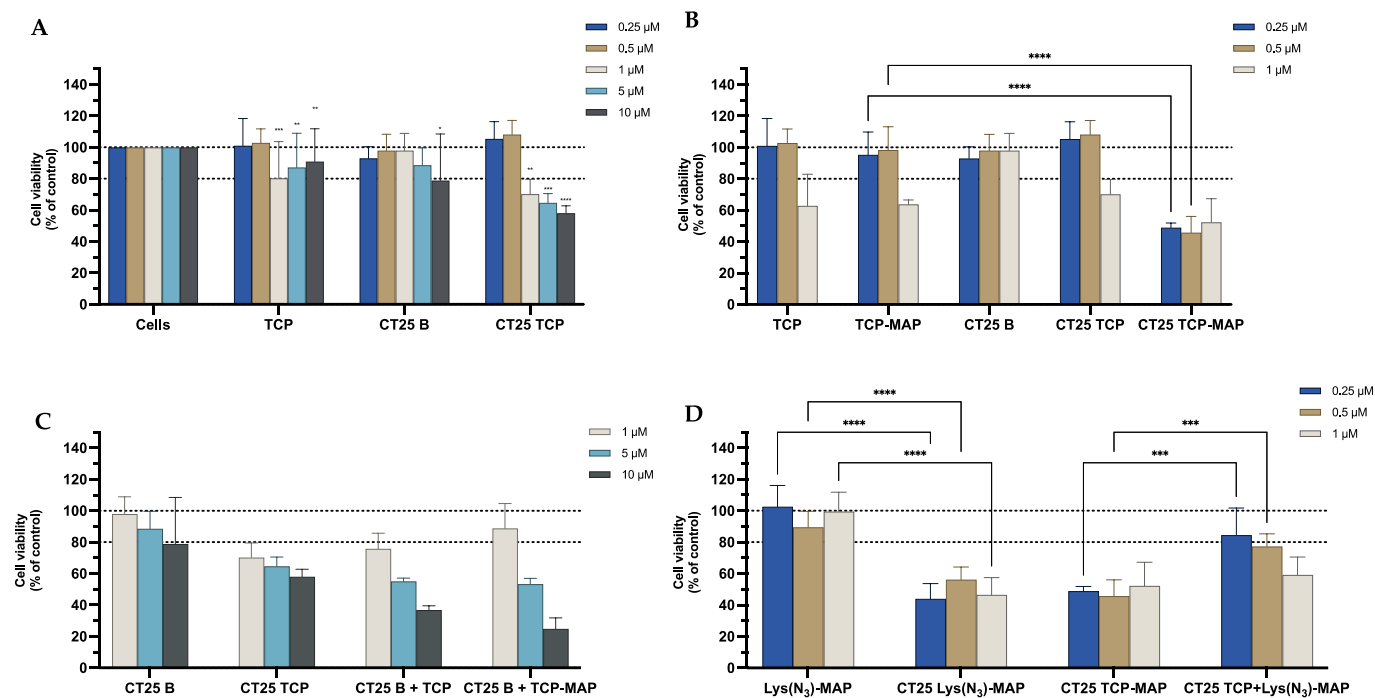

**Figure S17** - Relative cell viability of SH-SY5Y cell line measured by the SRB assay after 24 h incubation. (A) represents NLC safety test with the treatment of free TCP, blank CT25 and TCP loaded CT25 (0.25-10  $\mu$ M). (B) Represents differences in the cell viability of treatment with free TCP, TCP-MAP, blank CT25, TCP loaded CT25, MAP, TCP-MAP loaded CT25 (0.25-10  $\mu$ M). (C) Represents co-administration of TCP and TCP-MAP with blank CT25 (1-10  $\mu$ M). (D) Represents the data obtained from the encapsulation of Lys(N<sub>3</sub>)-MAP and co-encapsulation of TCP and Lys(N<sub>3</sub>)-MAP in the NLC compared to peptide conjugate. Results are expressed as mean $\pm$ SD (n = 4). Statistical analysis between the groups was performed using two-way ANOVA with Tukey's multiple comparisons test (\*  $p$  < 0.05; \*\*  $p$  < 0.01; \*\*\*  $p$  < 0.001; \*\*\*\*  $p$  < 0.0001).

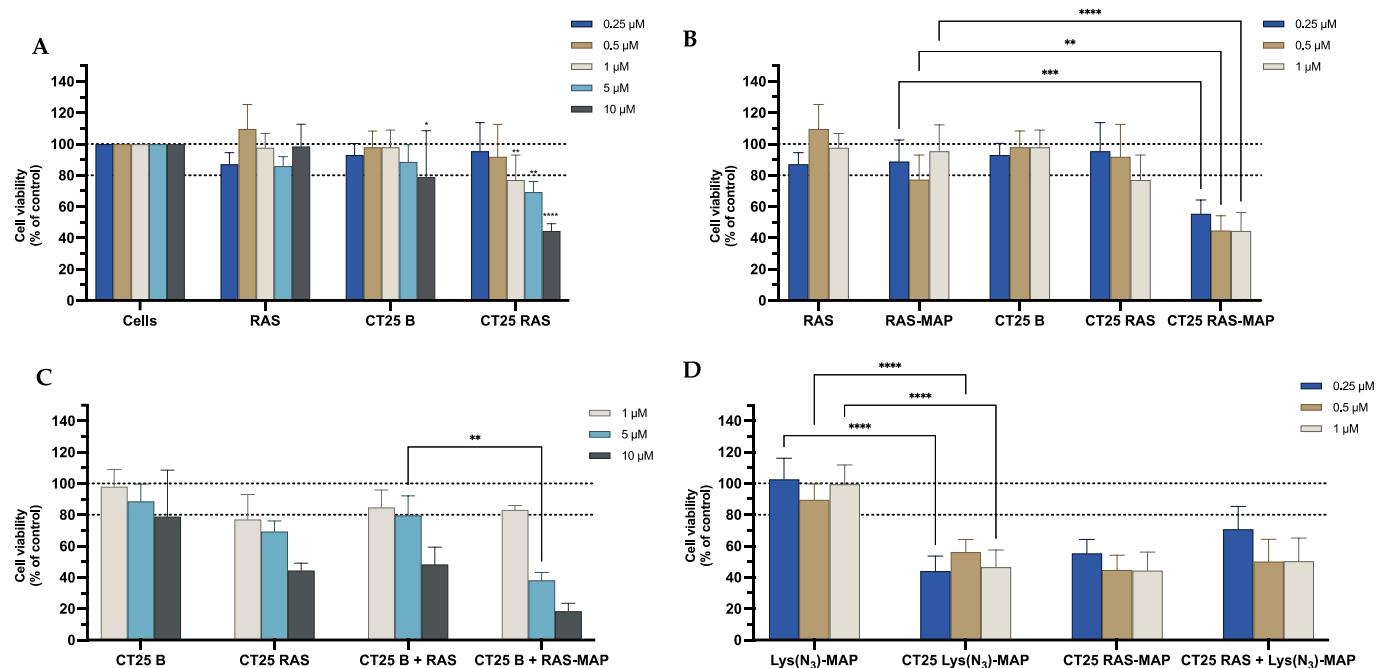

**Figure S18** - Relative cell viability of SH-SY5Y cell line measured by the SRB assay after 24 h incubation. (A) represents NLC safety test with the treatment of free RAS, blank CT25 and RAS loaded CT25 (0.25-10  $\mu$ M). (B) Represents differences in the cell viability of treatment with free RAS, RAS-MAP, blank CT25, RAS loaded CT25, MAP, RAS-MAP loaded CT25 (0.25-10  $\mu$ M). (C) Represents co-administration of RAS and RAS-MAP with blank CT25 (1-10  $\mu$ M). (D) Represents the data obtained from the encapsulation of Lys(N<sub>3</sub>)-MAP and co-encapsulation of RAS and Lys(N<sub>3</sub>)-MAP in the NLC compared to peptide conjugate. Results are expressed as mean $\pm$ SD (n = 4). Statistical analysis between the groups was performed using two-way ANOVA with Tukey's multiple comparisons test (\*  $p$  < 0.05; \*\*  $p$  < 0.01; \*\*\*  $p$  < 0.001; \*\*\*\*  $p$  < 0.0001).

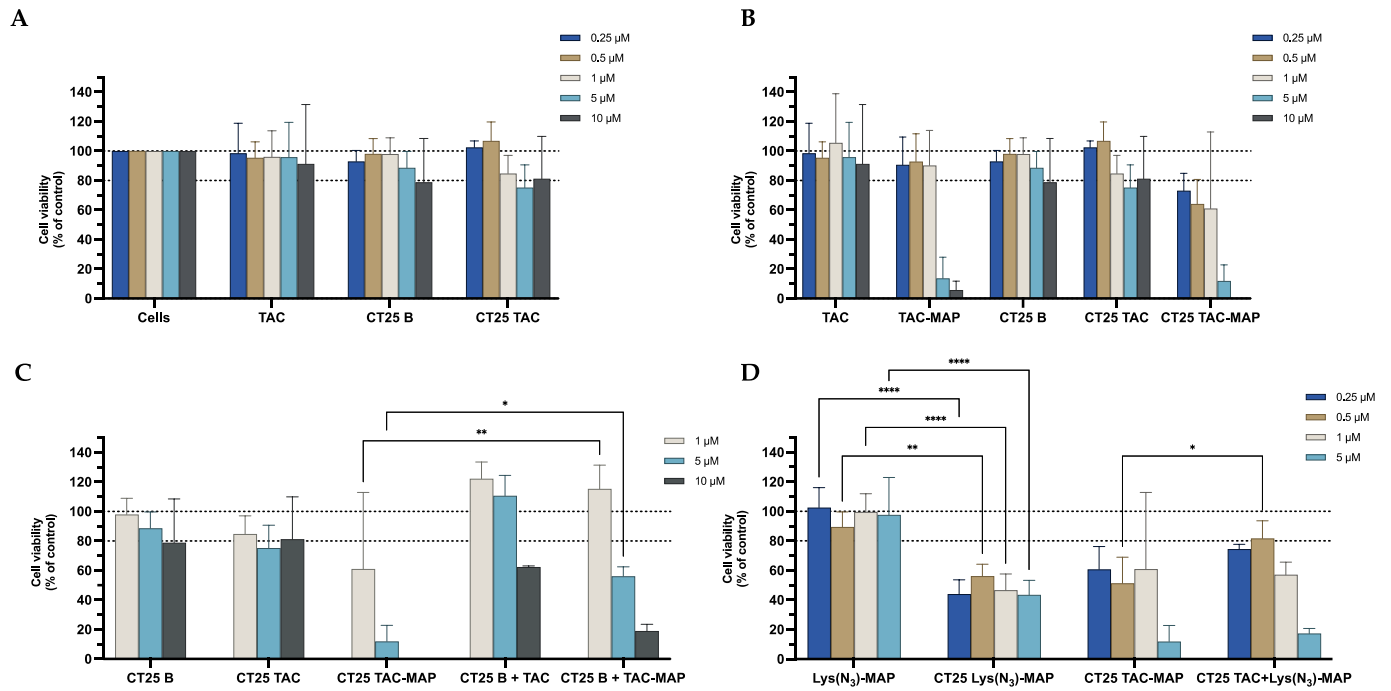

**Figure S19** - Relative cell viability of SH-SY5Y cell line measured by the SRB assay after 24 h incubation. (A) represents NLC safety test with the treatment of free TAC, blank CT25 and TAC loaded CT25 (0.25-10  $\mu$ M). (B) Represents differences in the cell viability of treatment with free TAC, TAC-MAP, blank CT25, TAC loaded CT25, MAP, TAC-MAP loaded CT25 (0.25-10  $\mu$ M). (C) Represents co-administration of TAC and TAC-MAP with blank CT25 (1-10  $\mu$ M). (D) Represents the data obtained from the encapsulation of Lys(N<sub>3</sub>)-MAP and co-encapsulation of TAC and Lys(N<sub>3</sub>)-MAP in the NLC compared to peptide conjugate. Results are expressed as mean $\pm$ SD (n = 4). Statistical analysis between the groups was performed using two-way ANOVA with Tukey's multiple comparisons test (\*  $p$  < 0.05; \*\*  $p$  < 0.01; \*\*\*\*  $p$  < 0.0001).

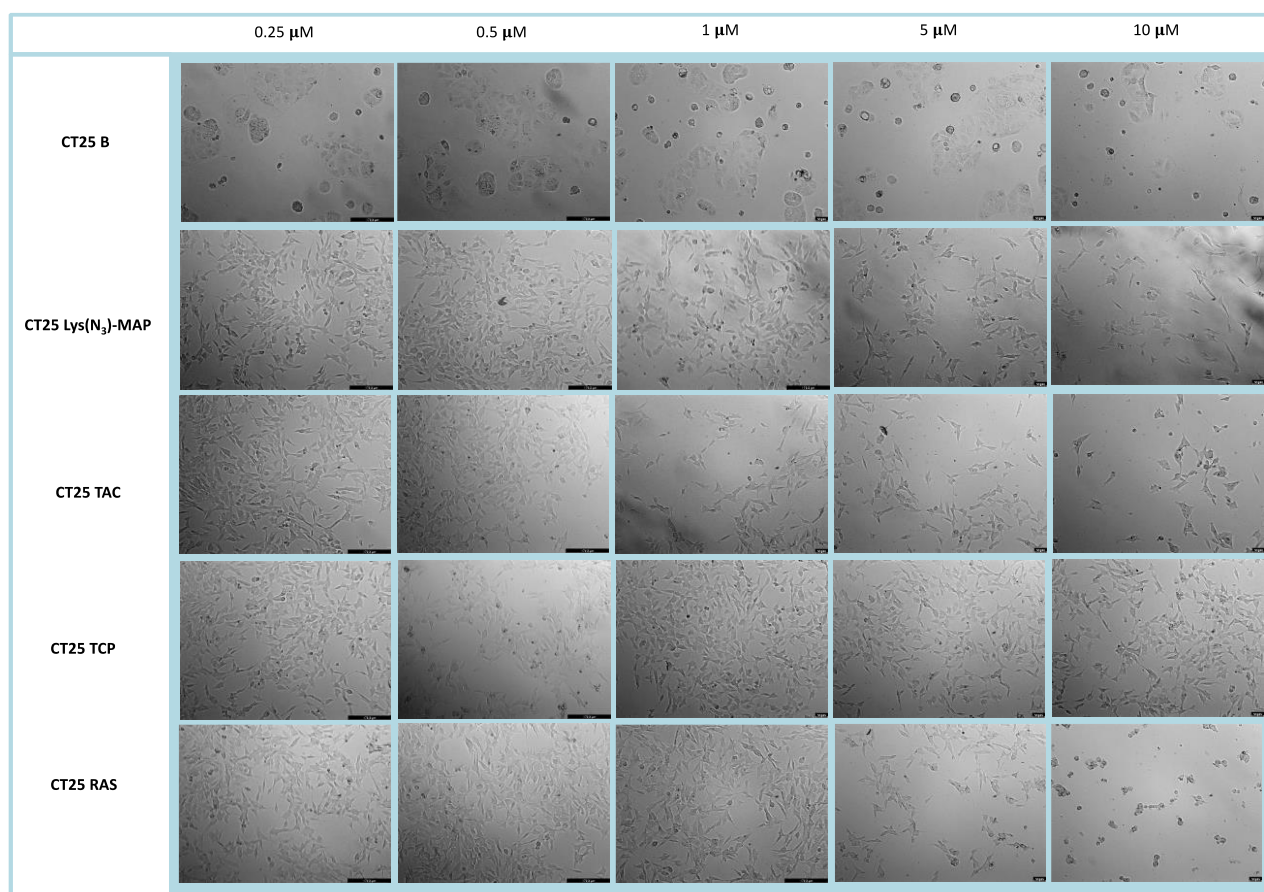

**Figure S20** - Microscope cellular visualization through Lionheart FX and Leica DFC350 FX of treatment with free drug and NLC loaded formulations on SH-SY5Y cell line at a concentration of 0.25, 0.5, 1, 5 and 10  $\mu\text{M}$ .

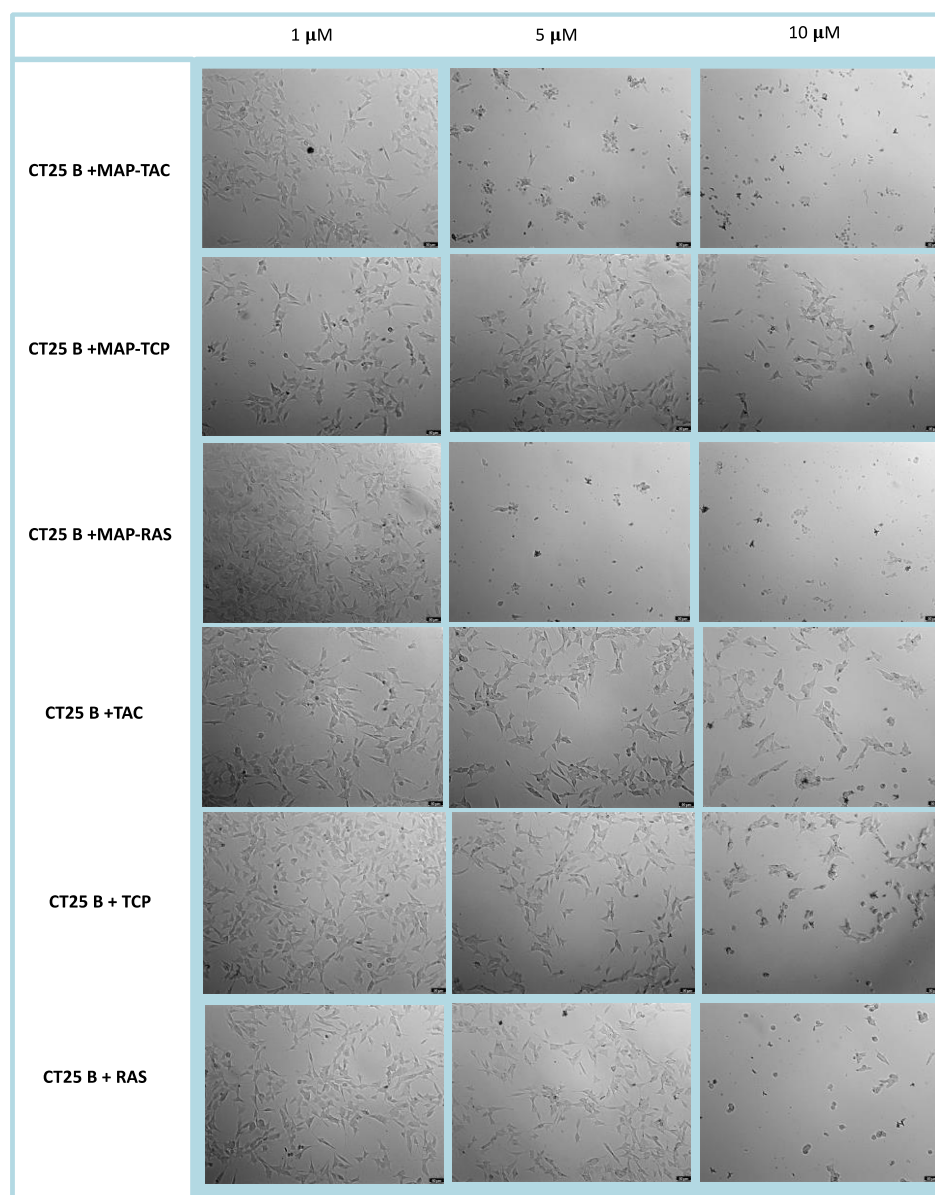

**Figure S21** - Microscope cellular visualization through Lionheart FX and Leica DFC350 FX of treatment with free drug and NLC loaded formulations on SH-SY5Y cell line at a concentration of 0.25, 0.5, 1, 5 and 10  $\mu$ M.
